# Supplementary material for: Significant reduction of cell invasiveness in nanoneedle insertion into a living cell with an electron-beam-deposited probe: impacts of probe geometry, speed and vibration
Source: Royal Society of Chemistry journal article supplement (doi:10.1039/d4nr04497e), 2025-01-01
Supplement: d4nr04497e1.pdf [file d4nr04497e1.pdf]

## **Significant reduction of cell invasiveness in nanoneedle insertion into a living cell with electron-beam-deposited probe: impacts of probe geometry, speed and vibration**

Mohammad Shahidul Alam,<sup>a</sup> Marcos Penedo,<sup>\*b</sup> Takehiko Ichikawa,<sup>c</sup> Mohammad Mubarak Hosain,<sup>a</sup> Kyosuke Matsumoto,<sup>d</sup> Keisuke Miyazawa,<sup>c,d</sup> and Takeshi Fukuma <sup>\*a,c,d</sup>

a. Division of Nano Life Science, Kanazawa University, Kakuma-machi, Kanazawa 920-1192, Japan. Email: [fukuma@staff.kanazawa-u.ac.jp](mailto:fukuma@staff.kanazawa-u.ac.jp)

b. École Polytechnique Fédérale de Lausanne, Institute for Bioengineering, Laboratory for Bio and Nanoinstrumentation, Lausanne CH 1015, Switzerland. Email: [marcos.penedo@epfl.ch](mailto:marcos.penedo@epfl.ch)

c. Nano Life Science Institute (WPI-NanoLSI), Kanazawa University, Kakuma-machi, Kanazawa 920-1192, Japan

d. Faculty of Frontier Engineering, Kanazawa University, Kakuma-machi, Kanazawa 920-1192, Japan

[\\*fukuma@staff.kanazawa-u.ac.jp](mailto:*fukuma@staff.kanazawa-u.ac.jp), [marcos.penedo@epfl.ch](mailto:marcos.penedo@epfl.ch)

## Confocal microscopy imaging with AFM

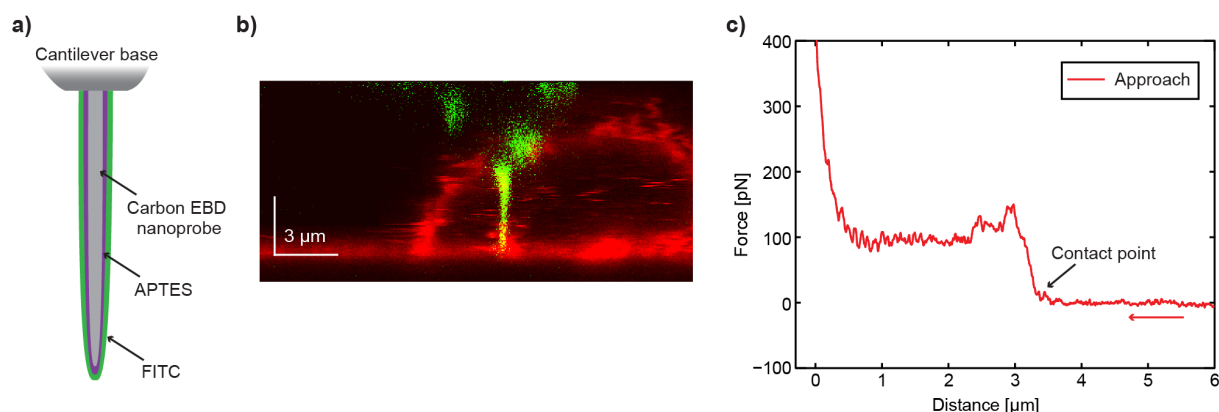

**Figure S1.** a) Schematic representation of carbon nanoprobe staining, which appears green in the confocal imaging of the cell's cross-section, with the nanoprobe positioned inside b). The confocal image obtained after performing the *F*-*z* curve measurement, shown in panel c).

The nanoprobe's penetration of the cell membrane was confirmed by a confocal microscopy experiment, as demonstrated in Supplementary Fig. S1. The nanoprobe was inserted into the living cell with an approach speed of 10 μm/s, avoiding the cell nucleus to obtain the *F*-*z* curve (Fig. S2c). To acquire the confocal image after cell penetration, the nanoprobe was kept inside the cell in contact with the surface during the image acquisition with the feedback on (Fig. S2b), retracting afterward with a speed of 10 μm/s. Fig. S2b shows the confocal image of the cell's cross section with the nanoprobe kept inside. The *F*-*z* curve, shown in Fig. S2c, also confirmed the penetration event by displaying a force drop after the initial rise. It is important to apply a sufficient set-point force to penetrate the cell membrane and reach the substrate.

### Protocol of cell membrane and AFM nanoprobe staining and confocal imaging

On the day of the experiment, the cells (cultured on a 35 mm glass dish (Ibidi)) were rinsed with PBS and kept in the incubator with 2 ml of DMEM (accompanied with 10% FBS and 1% PS), and 1 μl of Cellpaint™ Deep Red (AAT Bioquest) solution. After 30 minutes, the solution was substituted with 2 ml of Leibovitz L-15 medium (Gibco, (-) Phenol red) supplemented with 5% penicillin/streptomycin and imaged with confocal microscopy.

The AFM cantilever with carbon nanoprobe was first placed in the desiccator and treated with 1 ml of APTES (3-Aminopropyltriethoxysilane; >98%) (Tokyo Kasei Kogyo) for 30 minutes. Later the tip was immersed for another 30 minutes in a solution containing 1 mg/ml FITC (Fluorescein Isothiocyanate, Dojindo) and 1 ml of acetone. Finally, rinse the tip with acetone for 10 seconds. As a result of staining, the nanoprobe diameter was increased by 15-20 nm. We quickly transferred the cantilever to the experimental liquid soon after staining to prevent contamination on the nanoprobe.

Confocal imaging was performed with a confocal microscope (Abberior Instruments) combined with JPK Nanowizard ULTRA Speed 2 (Bruker Nano GmbH, Berlin, Germany). The cells and the nanoprobe were observed with a 100x oil-immersed objective lens. Images were taken using Imspector software. The excitation laser wavelength was set at 488 nm and the emission signal was divided into red (630-650 nm) and green (507 nm) signals to produce the confocal images of the stained cell membrane and carbon EBD nanoprobe. We used ImageJ software to analyze the data.

## Cell condition after cell penetration experiments

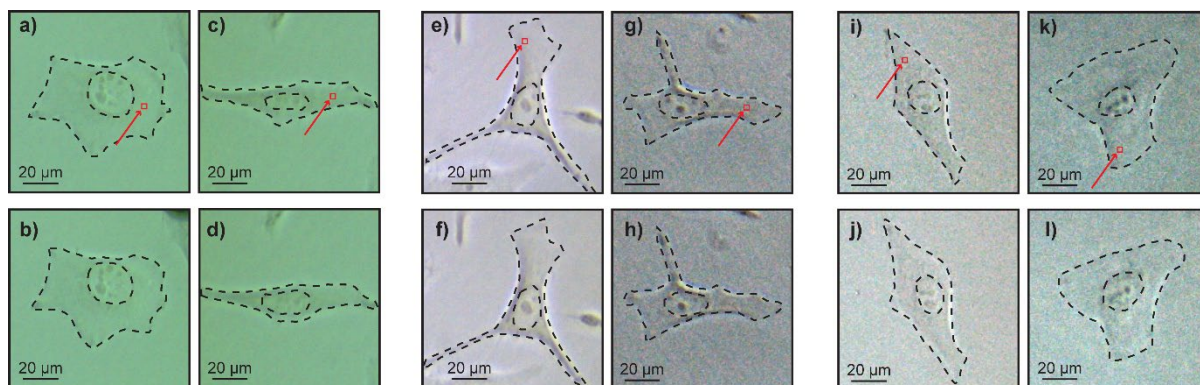

**Figure S2.** Optical images of cells before (a, c, e, g, i, k) and after (b, d, f, h, j, l) the single *F*-*z* curve obtained with 120 nm EBD carbon nanoprobe under various conditions: 5 μm/s static (a, b); 5 μm/s dynamic (c, d); 10 μm/s static (e, f); 10 μm/s dynamic (g, h); 30 μm/s static (i, j); 30 μm/s dynamic (k, l). The red arrow with square box indicates the penetration site with EBD nanoprobe.

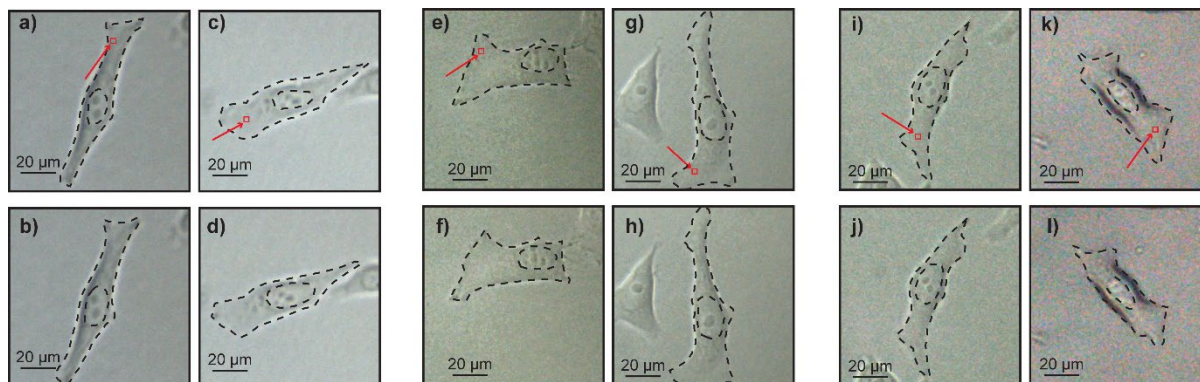

**Figure S3.** Optical images of cells before (a, c, e, g, i, k) and after (b, d, f, h, j, l) the single *F*-*z* curve obtained with 80 nm EBD carbon nanoprobe under various conditions: 5 μm/s static (a, b); 5 μm/s dynamic (c, d); 10 μm/s static (e, f); 10 μm/s dynamic (g, h); 30 μm/s static (i, j); 30 μm/s dynamic (k, l). The red arrow with square box indicates the penetration site with EBD nanoprobe.

### EBD carbon nanoprobes before and after experiments

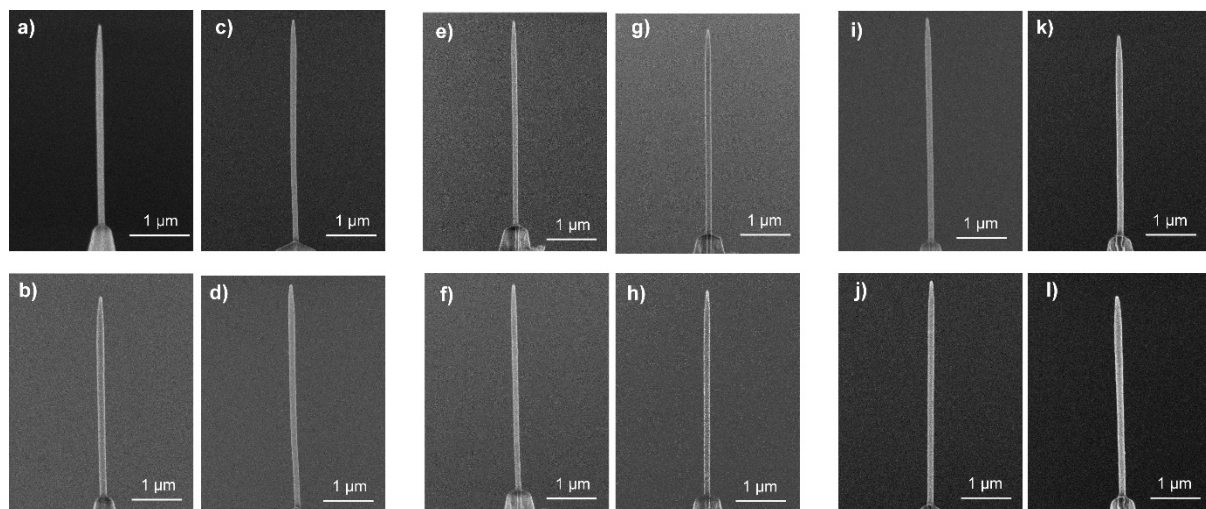

**Figure S4.** SEM images of 120 nm diameter EBD carbon nanoprobes before (a, c, e, g, i, k) and after (b, d, f, h, j, l) the cell penetration experiment: 5  $\mu\text{m/s}$  static (a, b); 5  $\mu\text{m/s}$  dynamic (c, d); 10  $\mu\text{m/s}$  static (e, f); 10  $\mu\text{m/s}$  dynamic (g, h); 30  $\mu\text{m/s}$  static (i, j); 30  $\mu\text{m/s}$  dynamic (k, l).

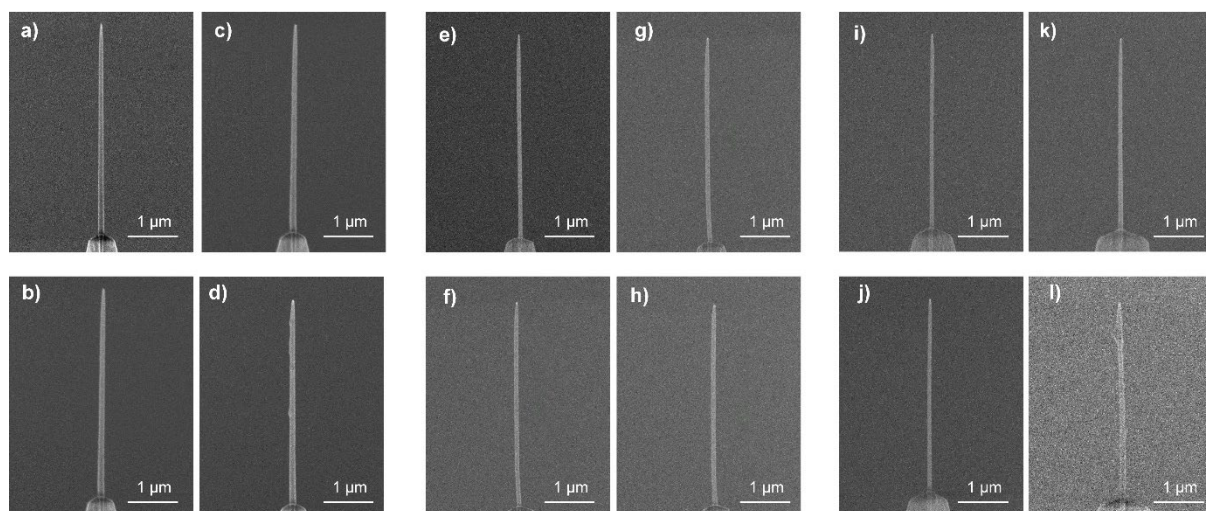

**Figure S5.** SEM images of 80 nm diameter EBD carbon nanoprobes before (a, c, e, g, i, k) and after (b, d, f, h, j, l) the cell penetration experiment: 5  $\mu\text{m/s}$  static (a, b); 5  $\mu\text{m/s}$  dynamic (c, d); 10  $\mu\text{m/s}$  static (e, f); 10  $\mu\text{m/s}$  dynamic (g, h); 30  $\mu\text{m/s}$  static (i, j); 30  $\mu\text{m/s}$  dynamic (k, l).

## Rms measurement during retraction phase of $F$ - $z$ curves

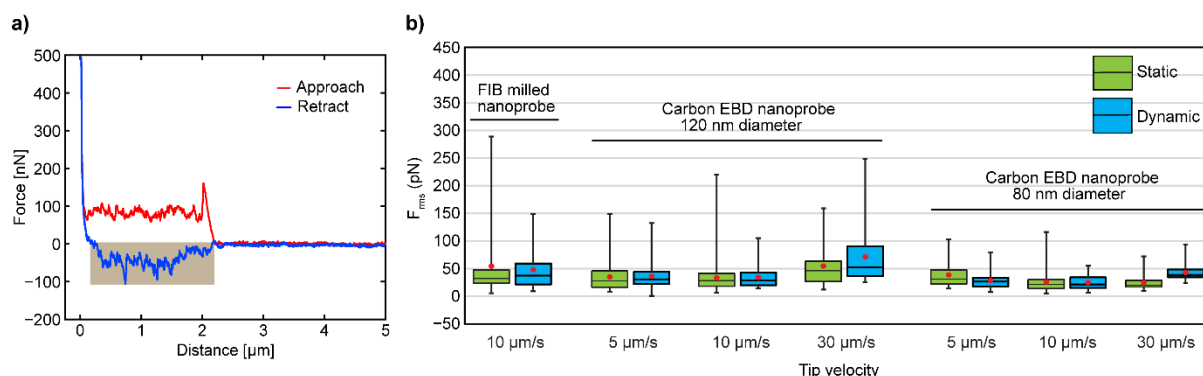

**Figure S6.** (a) root-mean-square amplitude ( $F_{rms}$ ) of the retraction  $F$ - $z$  profile under the baseline (marked region). (b) Results of the  $F_{rms}$  measurement at different speeds by using different methods with FIB-milled and EBD carbon nanoprobe.

**Table S1.** Statistical data of rms calculation during retraction phase of  $F$ - $z$  curves with EBD carbon nanoprobe in this study and FIB-milled nanoprobe in the previous study.

| Nanoprobe type                       | Tip speed | Operation modes | Average (pN)   | Median (pN) |
|--------------------------------------|-----------|-----------------|----------------|-------------|
| FIB milled nanoprobe                 | 10 μm/s   | static          | 54 ± 58        | 32          |
|                                      |           | dynamic         | 48 ± 34        | 37          |
| Carbon EBD nanoprobe 120 nm diameter | 5 μm/s    | static          | 35 ± 26        | 28          |
|                                      |           | dynamic         | 36 ± 21        | 31          |
|                                      | 10 μm/s   | static          | 34 ± 27        | 28          |
|                                      |           | dynamic         | <b>34 ± 18</b> | <b>28</b>   |
|                                      | 30 μm/s   | static          | 55 ± 38        | 47          |
|                                      |           | dynamic         | 71 ± 52        | 53          |
| Carbon EBD nanoprobe 80 nm diameter  | 5 μm/s    | static          | 39 ± 22        | 31          |
|                                      |           | dynamic         | 29 ± 26        | 26          |
|                                      | 10 μm/s   | static          | 26 ± 20        | 23          |
|                                      |           | dynamic         | <b>25 ± 12</b> | 22          |
|                                      | 30 μm/s   | static          | 25 ± 13        | <b>21</b>   |
|                                      |           | dynamic         | 43 ± 15        | 39          |

## **Force offset measurement of *F*-*z* curves**

**Table S2.** Statistical data of Force offset measurement of *F*-*z* curves with EBD carbon nanoprobe in this study and FIB-milled nanoprobe in the previous study.

| Nanoprobe type                       | Tip speed          | Operation modes | Average (pN)                  | Median (pN) |
|--------------------------------------|--------------------|-----------------|-------------------------------|-------------|
| FIB milled nanoprobe                 | 10 $\mu\text{m/s}$ | static          | $95 \pm 47$                   | 82          |
|                                      |                    | dynamic         | $78 \pm 59$                   | 60          |
| Carbon EBD nanoprobe 120 nm diameter | 5 $\mu\text{m/s}$  | static          | $91 \pm 75$                   | 64          |
|                                      |                    | dynamic         | $72 \pm 51$                   | 59          |
|                                      | 10 $\mu\text{m/s}$ | static          | $99 \pm 67$                   | 79          |
|                                      |                    | dynamic         | <b><math>59 \pm 39</math></b> | <b>52</b>   |
|                                      | 30 $\mu\text{m/s}$ | static          | $251 \pm 127$                 | 232         |
|                                      |                    | dynamic         | $176 \pm 129$                 | 132         |
| Carbon EBD nanoprobe 80 nm diameter  | 5 $\mu\text{m/s}$  | static          | $70 \pm 34$                   | 77          |
|                                      |                    | dynamic         | $54 \pm 30$                   | 48          |
|                                      | 10 $\mu\text{m/s}$ | static          | $44 \pm 18$                   | 41          |
|                                      |                    | dynamic         | <b><math>15 \pm 11</math></b> | <b>13</b>   |
|                                      | 30 $\mu\text{m/s}$ | static          | $139 \pm 35$                  | 130         |
|                                      |                    | dynamic         | $97 \pm 36$                   | 89          |
